# Supplementary material
Source: publisher figshare collection journal article supplement (https://frontiersin.figshare.com/ndownloader/files/28758906)

# MEgreen

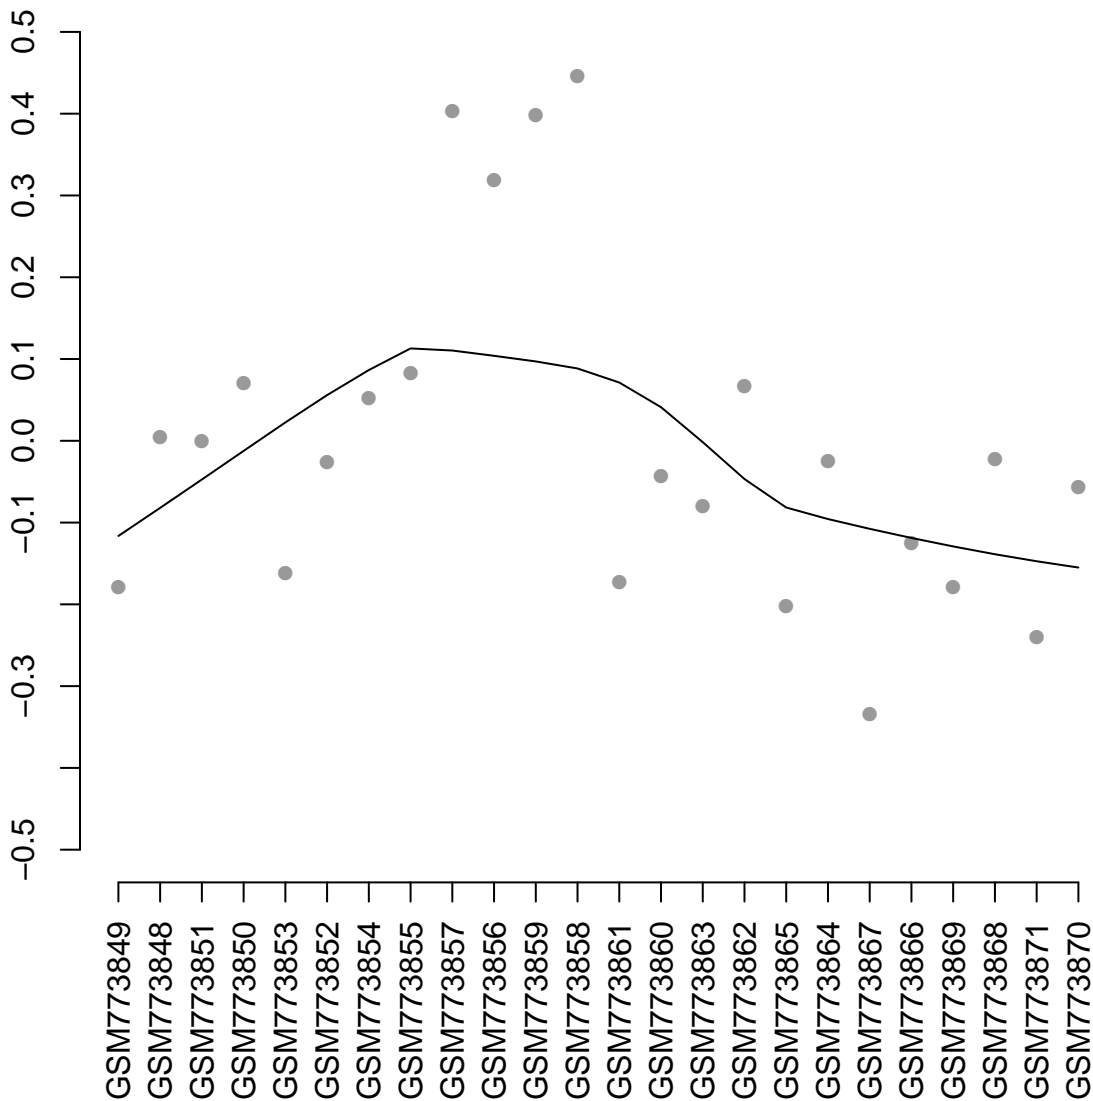

Supplement: Supplementary file [file 28758906]
